# Supplementary material
Source: PubMed Central journal article supplement (PMC3057225)

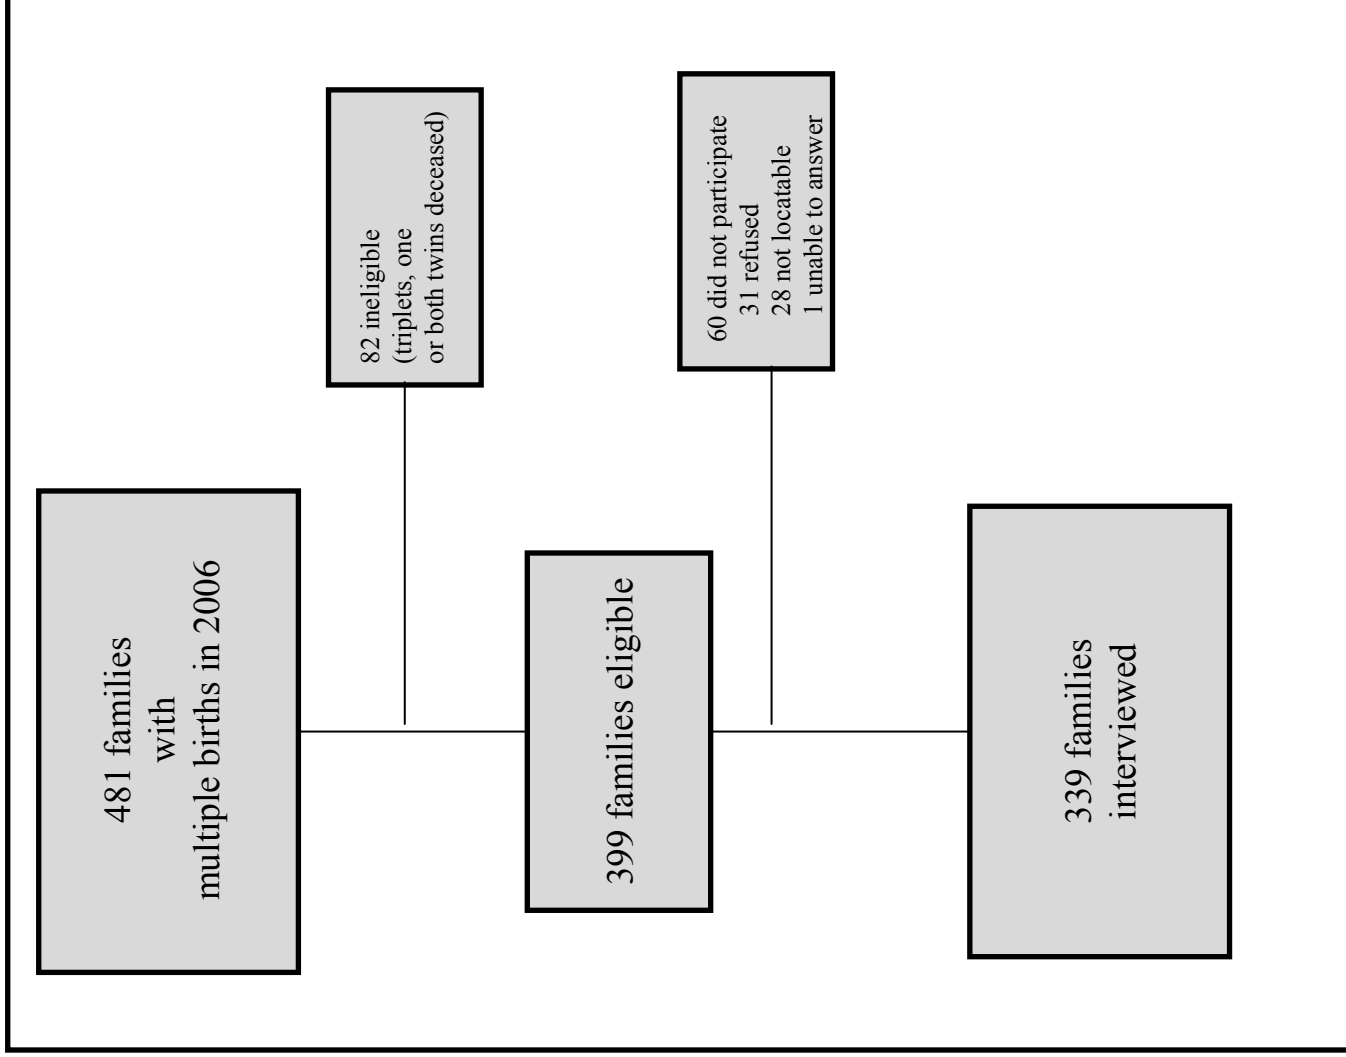

Supplement: NIHMS254340-supplement-01.pdf [file NIHMS254340-supplement-01.pdf]
